# Supplementary material for: STIRLING DISTRIBUTIONS AND STIRLING NUMBERS OF THE SECOND KIND. COMPUTATIONAL PROBLEMS IN STATISTICS
Source: Atypon-hosted journal article supplement (doi:10.1176/appi.psychotherapy.20200050), 1994-01-01

## Appendix: Online Supplement Diagram

### IPT-G CONSORT Flow Diagram

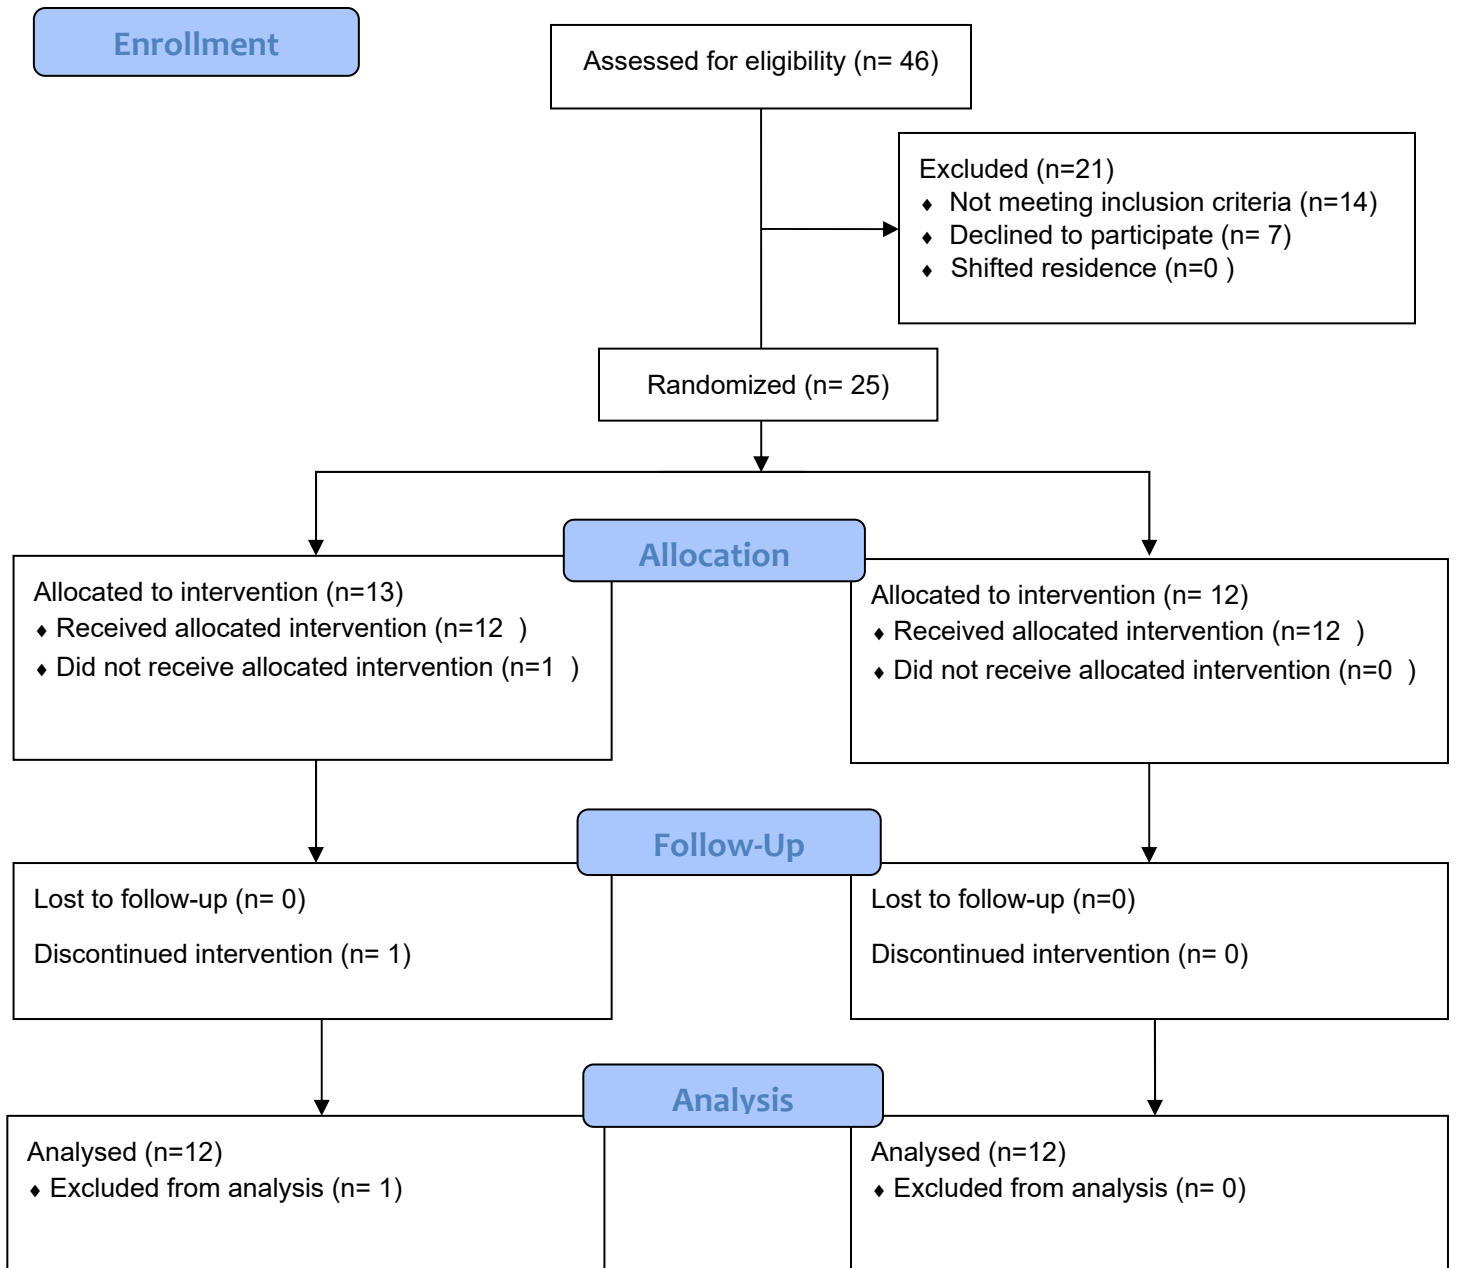

**Appendix: Online Supplement figure**

**Sustainability over time (depression scores)**

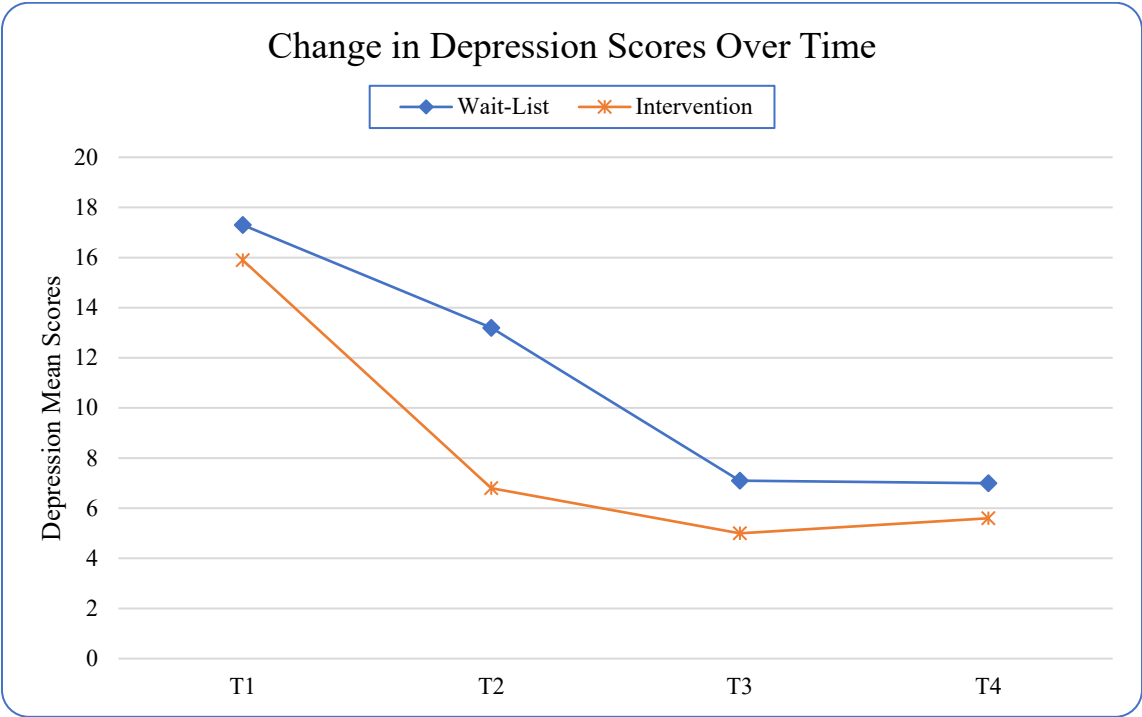

Supplement: appi.psychotherapy.20200050.ds001.pdf [file appi.psychotherapy.20200050.ds001.pdf]
